# Supplementary material for: Permeation of Therapeutic Drugs in Different Formulations across the Airway Epithelium In Vitro
Source: PubMed Central journal article supplement (PMC4537286; doi:10.1371/journal.pone.0135690), 2015-08-14
Supplement: pone.0135690.s002.pdf [file pone.0135690.s002.pdf]

Table 1s: Product information of tested membrane inserts

| <b>Producer /trade name</b> | <b>Membrane material</b>   | <b>Pore size (µm)</b> | <b>Pore density/cm<sup>2</sup></b> | <b>Optical properties</b> | <b>Reference</b>                                                                                                                                                                                                            |
|-----------------------------|----------------------------|-----------------------|------------------------------------|---------------------------|-----------------------------------------------------------------------------------------------------------------------------------------------------------------------------------------------------------------------------|
| Corning® Transwell®         | Polycarbonate              | 0.4                   | 1 x 10 <sup>8</sup>                | Translucent               | <a href="https://www.warneronline.com/Documents/uploader/Corning-Snapwell-Transwell%20Instruction%20Manual1.pdf">https://www.warneronline.com/Documents/uploader/Corning-Snapwell-Transwell%20Instruction%20Manual1.pdf</a> |
|                             | Polyester                  | 0.4                   | 4 x 10 <sup>6</sup>                | Clear                     |                                                                                                                                                                                                                             |
|                             | Polycarbonate              | 3                     | 2 x 10 <sup>6</sup>                | Translucent               |                                                                                                                                                                                                                             |
|                             | Polyester                  | 3                     | 2 x 10 <sup>6</sup>                | Clear                     |                                                                                                                                                                                                                             |
| Greiner Bio-One/ThinCert™   | Polyethylene terephthalate | 0.4                   | 1 x 10 <sup>8</sup>                | Translucent               | <a href="http://www.greiner-bio-one.co.jp/products/PDF/ThinCertsPDF.pdf">http://www.greiner-bio-one.co.jp/products/PDF/ThinCertsPDF.pdf</a>                                                                                 |
|                             | Polyethylene terephthalate | 0.4                   | 2 x 10 <sup>6</sup>                | Transparent               |                                                                                                                                                                                                                             |
|                             | Polyethylene terephthalate | 3                     | 2 x 10 <sup>6</sup>                | Translucent               |                                                                                                                                                                                                                             |
|                             | Polyethylene terephthalate | 3                     | 0.6 x 10 <sup>6</sup>              | Transparent               |                                                                                                                                                                                                                             |
|                             | Polycarbonate              | 3                     | 2 x 10 <sup>6</sup>                | Translucent               |                                                                                                                                                                                                                             |
